# Supplementary material for: Phosphorylation-Dependent SERS Readout for Activity Assay of Protein Kinase A in Cell Extracts
Source: MDPI journal article supplement (doi:10.3390/nano10030575), 2020-03-22
Supplement: s1 [file s1]

## Supplementary Materials

### Phosphorylation-Dependent SERS Readout for Activity Assay of Protein Kinase A in Cell Extracts

Renyong Liu <sup>1</sup>, Chenggen Xie <sup>1</sup>, Yehan Yan <sup>1</sup>, Lin Hu <sup>2,\*</sup>, Suhua Wang <sup>3,4</sup>, Khalid A. Alamry <sup>4</sup>, Hadi M. Marwani <sup>4</sup> and Lijuan Chen <sup>1,\*</sup>

<sup>1</sup> Key Laboratory of Biomimetic Sensor and Detecting Technology of Anhui Province, School of Materials and Chemical Engineering, West Anhui University, Lu'an, Anhui 237012, China; ahlry@mail.ustc.edu.cn (R.L.); cgxie@wxc.edu.cn (C.X.); yanyh@mail.ustc.edu.cn (Y.Y.)

<sup>2</sup> Anhui Province Key Laboratory of Condensed Matter Physics at Extreme Conditions, High Magnetic Field Laboratory, Chinese Academy of Sciences, Hefei, Anhui 230031, China

<sup>3</sup> College of Environmental Science and Engineering, North China Electric Power University, Beijing 102205, China; wangshuhua@ncepu.edu.cn (S.W.)

<sup>4</sup> Chemistry Department, Faculty of Science, King Abdulaziz University, Jeddah 21589, Saudi Arabia; k\_alamry@yahoo.com (K.A.A.); hmarwani@kau.edu.sa (H.M.M.)

\* Correspondence: hulingg@mail.ustc.edu.cn (L.H.); lijuanchen@mail.ustc.edu.cn (L.C.); Tel.: +86-0551-65591149 (L.H.); +86-0564-3305690 (L.C.)

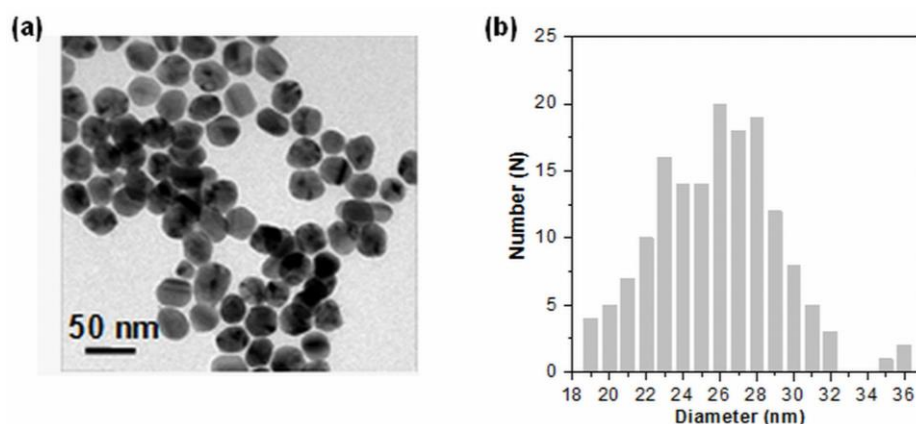

**Figure S1.** (a) TEM image of spermine-functionalized AgNPs in aqueous solution. (b) The size distribution of spermine-functionalized AgNPs determined by TEM examination (N = 158).

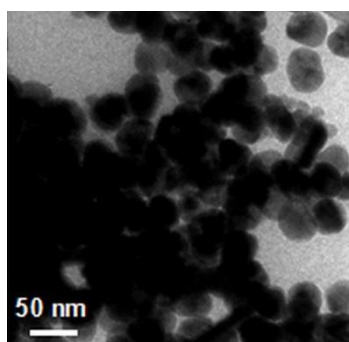

**Figure S2.** TEM image of the aggregated AgNPs in Tris-HCl buffer (50 mM, pH 7.5).

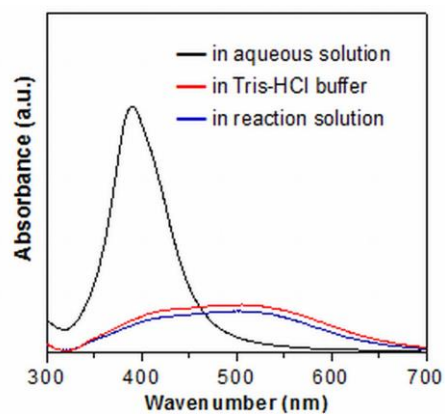

**Figure S3.** UV-vis spectra of AgNPs in aqueous solution, Tris-HCl buffer and PKA reaction solution, respectively.

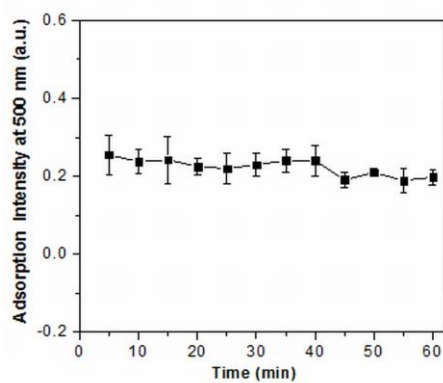

**Figure S4.** The absorption intensity of aggregated AgNPs (~500 nm) as a function of the incubation time.

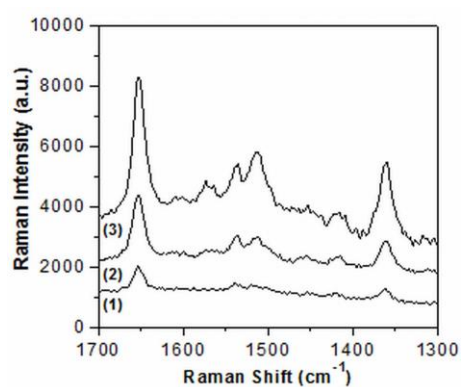

**Figure S5.** SERS spectra obtained from HeLa cell extracts (1) without or with the stimulation of (2) 10  $\mu$ M forskolin/20  $\mu$ M IBMX and (3) 25  $\mu$ M forskolin/50  $\mu$ M IBMX, respectively.
